# Supplementary material
Source: Research Square preprint supplement (doi:10.21203/rs.3.rs-9064760/v1)
Supplement: Supplementary file 1 [file 0d14aefbf1659ed5f6ef6696.docx]

Based on the LLR algorithm of CiteSpace, this paper extracted 11 research clusters from the keywords of DSRCT-related studies. Statistical analysis showed that this clustering result was statistically significant with a Q value of 0.7175, and it also had high reliability with an S value of 0.9036. These 11 clusters comprehensively represent the major research themes in the field of DSRCT.

**Cluster #0: Pathological Differential Diagnosis**

Focused on DSRCT’s pathological diagnosis/differentiation, core keywords: "ewing sarcoma", "immunohistochemistry", "rhabdomyosarcoma", "neuroblastoma", "small round blue cell tumors". Highlights reliance on microscopic differentiation from other small round blue cell tumors (Ewing sarcoma, rhabdomyosarcoma, neuroblastoma), with immunohistochemistry (e.g., epithelial membrane antigen) as a key tool—underscoring diagnostic complexity.

**Cluster #1: Molecular Diagnostic Techniques**

For DSRCT’s molecular diagnosis, keywords ("translocation", "PCR", "fine needle aspiration", "cytologic diagnosis") define direction. Core: cytogenetics (e.g., chromosomal translocation "22)(p13") and PCR for needle biopsy molecular typing—critical for diagnosis (especially difficult cases)—reflecting precision medicine’s role.

**Cluster #2: Genetics and Molecular Markers**

Covers DSRCT’s molecular genetic basis/detection; keywords: "primitive neuroectodermal tumor", "molecular genetics", "wt1 genes", "rt-pcr". Emphasizes PNET genetic differentiation, explores WT1, uses RT-PCR for gene fusion detection—bridges traditional pathology and molecular biology.

**Cluster #3: Clinical Comprehensive Treatment Strategies**

Largest clinical cluster; core: multimodal treatment. Keywords ("multimodal treatment", "cytoreductive surgery", "HIPEC", "trabectedin", "phase ii"): aggressive surgery (cytoreductive surgery + HIPEC) for carcinomatosis, phase II trials of new drugs (e.g., trabectedin)—top clinical research frontier.

**Cluster #4: Tumor Location and Molecular Characteristics**

Links tumor locations ("kidney", "bone", "peritoneum") to molecular features ("wt1", "ews r1"). Focuses on predominant intra-abdominal occurrence/rare sites (kidney, bone); all share EWSR1-WT1 etiology—connects phenotype and genotype.

**Cluster #5: Biological Behavior and Prognosis**

Covers clinicopathological behavior/prognosis; keywords ("ews wt1 gene fusion", "prognosis", "aggressive behavior", "children oncology group"). Aims to clarify aggressive behavior’s molecular basis (e.g., gene fusion) and identify prognostic factors via large studies (e.g., COG)—guides treatment/patient stratification.

**Cluster #6: Rare Manifestations and Associated Diseases**

Aggregates DSRCT’s rare manifestations/sites/differential diseases (e.g., "papillary serous carcinoma", "mesothelioma", "wilms tumor", "denys drash syndrome"). Reveals diverse manifestations, mesothelioma overlap, WT/Denys-Drash molecular links—specialized direction.

**Cluster #7: Functional Mechanism of Fusion Proteins**

Basic research on "ews-wt1 fusion protein"; keywords ("fusion transcript", "antigen", "survival", "mice"). Explores oncogenic function, antigen potential, cell survival effects, mouse model studies—basis for future targeted therapy.

**Cluster #8: Genetics and Etiology**

Broad tumor genetics context; keywords ("gene fusions", "chromosome translocation", "sarcoma", "agent orange"). Places DSRCT in sarcoma/chromosomal translocation context, explores etiological risks (e.g., Agent Orange)—macro perspective.

**Cluster #9: Core Treatment Modalities**

Defines pillar regimens: "chemotherapy", "radiotherapy". Keywords ("management", "trial", "anlotinib", "aggressive multimodality therapy"): relies on aggressive multimodal treatment; trials explore new drugs (anlotinib, adriamycin) and radiotherapy (whole abdominopelvic)—clinical practice cornerstone.

**Cluster #10: Cases and Imaging Findings**

Basic clinical diagnosis; keywords ("pathology", "abdomen", "ct findings", "case report"). Focuses on CT-detected abdominal lesions, combined pathology, case report sharing—starts/improves disease characterization/cognition.
